# Supplementary material for: Excited States Computation of Models of Phenylalanine Protein Chains: TD-DFT and Composite CC2/TD-DFT Protocols
Source: MDPI journal article supplement (doi:10.3390/ijms23020621), 2022-01-06
Supplement: s1 [file s1]

# Supporting Information

---

## Excited states computation of models of phenylalanine protein chains: TDDFT and composite CC2/TDDFT protocols

Marine Lebel , Thibaut Very <sup>†</sup>, Eric Gloaguen, Benjamin Tardivel, Michel Mons and Valérie Brenner<sup>\*</sup>

LIDYL, CEA, CNRS, Université Paris-Saclay, 91191, Gif-sur-Yvette, France

<sup>\*</sup> Correspondence: valerie.brenner@cea.fr

<sup>†</sup> Present address: IDRIS - CNRS, Orsay cedex, France, F-91403

---

S1: B97-D2/TZVPP optimized geometries of Fa A-D.

S2: Nature and CC2/cc-pVDZ vertical excitation energies of the five lowest excited states of Fa A, C and D at the B97-D2/TZVPP optimized geometry of the ground state.

S3: Nature and LC- $\omega$ PBE/cc-pVDZ vertical excitation energies of the five lowest excited states of Fa A-D at the B97-D2/TZVPP optimized geometry of the ground state. Variation of the nature and vertical excitation energies of the five lowest excited states of Fa B according the value of  $\omega$ .

S4: Nature and CAM-B3LYP/cc-pVDZ vertical excitation energies of the five lowest excited states of Fa A-D at the B97-D2/TZVPP optimized geometry of the ground state.

S5: Nature and  $\omega$ B97X-D/cc-pVDZ vertical excitation energies of the five lowest excited states of Fa A-D at the B97-D2/TZVPP optimized geometry of the ground state.

S6: Characteristic geometrical parameters of the lowest excited state ( $S_1$ ) of the four Fa A-D conformers and comparison of their CC2/cc-pVDZ optimized geometries<sup>3</sup> with those obtained at the TD-DFT level.

S7: *Amide A* region frequencies of both the ground ( $S_0$ ) and  $\pi\pi^*$  excited ( $S_1$ ) states of the four Fa A-D conformers.

S8: Characteristic geometrical parameters of CC2/<sup>3</sup> and  $\omega$ B97XD/cc-pVXZ optimized geometries of both the ground ( $S_0$ ) and lowest  $\pi\pi^*$  excited ( $S_1$ ) states of the GFa A, FFa A<sub>1</sub>, A<sub>2</sub>,C and QFa A, C conformers.

S9: NTOs of the lowest  $\pi\pi^*$  excited states ( $S_1$ ) of GFa A-B, FFa A<sub>1</sub>,A<sub>2</sub>,C and QFa A,C at their CC2 and  $\omega$ B97XD/cc-pVDZ optimized geometries.

S10: *Amide A* region frequencies of both the ground ( $S_0$ ) and  $\pi\pi^*$  excited ( $S_1$ ) states of the GFa A-B, FFa A<sub>1</sub>,A<sub>2</sub>,C and QFa A,C conformers.

S11: Experimental vs  $\omega$ B97XD/cc-pVDZ calculated harmonic *amide A* region frequencies of both the  $S_0$  and  $S_1$  states of the series of capped peptides and the corresponding mode-dependent linear ( $v_{\text{exp.}} = a v_{\text{theo.}} + b$ ) scaling functions.

S12: Timing of TD-DFT and CC2 calculations

References

S1: B97-D2/TZVPP optimized geometries of Fa A-D.

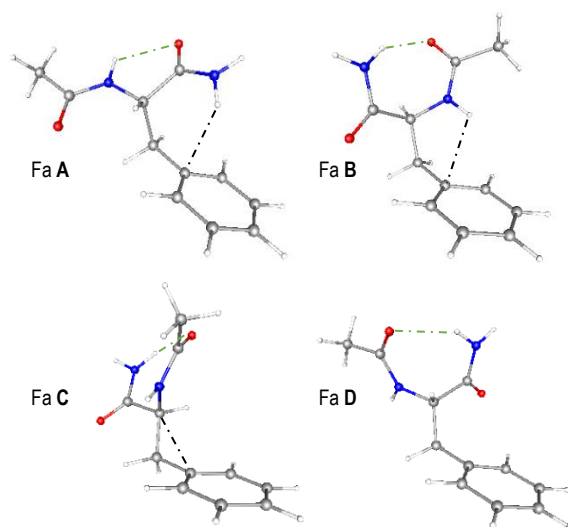

**Figure S1a.** B97-D2/TZVPP optimized geometries of the ground state of Fa A-D exhibiting C<sub>5</sub> or C<sub>7</sub> H-bond (green dashes) and sometimes NH... $\pi$  interaction (black dashes).

**Table S1.** Characteristic geometrical parameters of the ground state (S<sub>0</sub>) of Fa A-D optimized at the DFT-D level.<sup>1-2</sup>

|                |   | Dihedral angles (°) <sup>[a]</sup> |        |          | Intermolecular distances (Å) |                                                   |
|----------------|---|------------------------------------|--------|----------|------------------------------|---------------------------------------------------|
|                |   | $\Phi$                             | $\Psi$ | $\chi^1$ | d <sub>NH...O</sub>          | d <sub>NH...<math>\pi</math></sub> <sup>[b]</sup> |
| S <sub>0</sub> | A | -160                               | 159    | 192      | 2.28                         | 2.56 (3.37, 2.84)                                 |
|                | B | -83                                | 55     | 44       | 2.02                         | 2.44 (3.23, 2.54)                                 |
|                | C | -85                                | 72     | -55      | 2.03                         | 2.77 (3.76, 2.85)                                 |
|                | D | -83                                | 84     | 193      | 2.24                         |                                                   |

[a] For the definition of the dihedral angles, see Figure S1b.

[b] The NH... $\pi$  bond is characterized by three distances: the distance of the NH<sub>2</sub> (A conformer) or NH<sub>Phe</sub> (B conformer and C conformer) hydrogen atom with the C <sub>$\gamma$</sub>  carbon atom of the phenylalanine residue and in parentheses the two distances with the two C <sub>$\delta$</sub>  carbon atoms (C <sub>$\delta$</sub> <sup>C-term</sup>, C <sub>$\delta$</sub> <sup>N-term</sup>) of the phenylalanine residue.

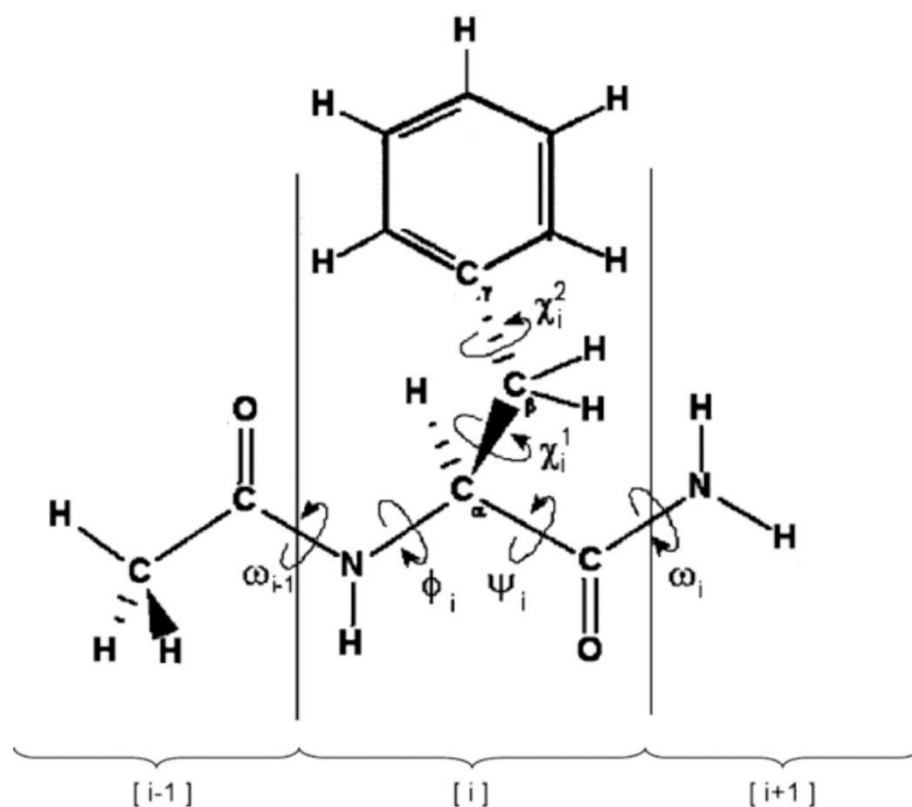

**Figure S1b.** Definition of the characteristic dihedral angles of the backbone of capped peptides: Example of N-Ac-Phe-NH<sub>2</sub> (Fa) from the N-terminus (left-most [i-1] module) through the central Phe (central [i] module) to C-terminal NH<sub>2</sub> protecting group (right-most [i+1] module).

**S2: Nature and CC2/cc-pVDZ<sup>3</sup> vertical excitation energies of the five lowest excited states of Fa A, C and D at the B97-D2/TZVPP optimized geometry of the ground state.**

**Table S2a.** Nature and vertical excitation energies of the five lowest excited states of Fa A.

| Fa A           | E <sub>vert</sub> <sup>[a]</sup> (eV) | Nature of the state <sup>[b]</sup>         | NTOs (% , occupied→virtual) <sup>[b]</sup>                                                                                                                                        |
|----------------|---------------------------------------|--------------------------------------------|-----------------------------------------------------------------------------------------------------------------------------------------------------------------------------------|
| S <sub>1</sub> | 5.234                                 | $\pi\pi^*$                                 | 1-55% 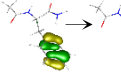 2-44%  |
| S <sub>2</sub> | 5.894                                 | $n\pi^*_{CO(1)}$                           | 1-96%                                                                                            |
| S <sub>3</sub> | 5.985                                 | $n\pi^*_{CO(2)}$                           | 1-95%                                                                                            |
| S <sub>4</sub> | 6.456                                 | $\pi\pi^*$                                 | 1-77%  2-18%  |
| S <sub>5</sub> | 6.948                                 | $n_{(1)}[\pi^*\pi^*_{CO(1,2)}] + \pi\pi^*$ | 1-69%  2-28%  |

[a] The theoretical values are given with the number of significant digits obtained in the experiment. [b] In the event of several couples of NTOs, only those whose contribution to the wave function is greater than 10% are taken into account and reported. The nature of the states is determined from these contributions.

**Table S2b.** Nature and vertical excitation energies of the five lowest excited states of Fa C.

| Fa C           | E <sub>vert</sub> <sup>[a]</sup> (eV) | Nature of the state <sup>[b]</sup> | NTOs (% , occupied→virtual) <sup>[b]</sup>                                                                                                                                            |
|----------------|---------------------------------------|------------------------------------|---------------------------------------------------------------------------------------------------------------------------------------------------------------------------------------|
| S <sub>1</sub> | 5.246                                 | $\pi\pi^*$                         | 1-55% 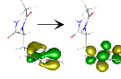 2-44%  |
| S <sub>2</sub> | 5.799                                 | $n\pi^*_{CO(2)}$                   | 1-98%                                                                                              |
| S <sub>3</sub> | 5.966                                 | $n\pi^*_{CO(1)}$                   | 1-99%                                                                                              |
| S <sub>4</sub> | 6.556                                 | $\pi\pi^*$                         | 1-67%  2-31%  |
| S <sub>5</sub> | 6.888                                 | $n_{(1,2)}[\pi^*\pi^*_{CO(1)}]$    | 1-90%                                                                                              |

[a] and [b] Same details as Table S2a.

**Table S2c.** Nature and vertical excitation energies of the five lowest excited states of Fa D.

| Fa D           | E <sub>vert</sub> <sup>[a]</sup> (eV) | Nature of the state <sup>[b]</sup>                               | NTOs (% , occupied→virtual) <sup>[b]</sup> |                                                                                   |       |                                                                                     |
|----------------|---------------------------------------|------------------------------------------------------------------|--------------------------------------------|-----------------------------------------------------------------------------------|-------|-------------------------------------------------------------------------------------|
| S <sub>1</sub> | 5.260                                 | $\pi\pi^*$                                                       | 1-53%                                      | 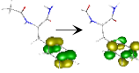 | 2-47% |  |
| S <sub>2</sub> | 5.759                                 | $n\pi^*_{CO(2)}$                                                 | 1-99%                                      |  |       |                                                                                     |
| S <sub>3</sub> | 5.910                                 | $n\pi^*_{CO(1)}$                                                 | 1-100%                                     |  |       |                                                                                     |
| S <sub>4</sub> | 6.565                                 | $\pi\pi^*$                                                       | 1-69%                                      |  | 2-28% |  |
| S <sub>5</sub> | 7.024                                 | $n_{(1,2)}\pi^*_{CO(1)}$<br>+ $[n_{(2)}\pi][\pi^*\pi^*_{CO(2)}]$ | 1-74%                                      |  | 2-14% |  |

[a] and [b] Same details as Table S2a.

**S3: Nature and LC- $\omega$ PBE/cc-pVDZ vertical excitation energies of the five lowest excited states of Fa A-D at the B97-D2/TZVPP optimized geometry of the ground state.**

**Table S3a.** Nature and vertical excitation energies of the five lowest excited states of Fa A.

| Fa A           | E <sub>vert</sub> <sup>[a]</sup> (eV) | Nature of the state <sup>[b]</sup>                       | NTOs (% , occupied→virtual) <sup>[b,c]</sup> |        |
|----------------|---------------------------------------|----------------------------------------------------------|----------------------------------------------|--------|
| S <sub>1</sub> | 5.482                                 | $\pi\pi^*$                                               | 1- 57%                                       | 2- 43% |
| S <sub>2</sub> | 5.752                                 | $n\pi^*_{CO(1)}$                                         | 1- 99%                                       |        |
| S <sub>3</sub> | 5.833                                 | $n\pi^*_{CO(2)}$                                         | 1- 99%                                       |        |
| S <sub>4</sub> | 6.222                                 | $\pi\pi^*$                                               | 1- 64%                                       | 2- 32% |
| S <sub>5</sub> | 7.125                                 | $\pi\pi^* +$<br>[ $n_{(1)}\pi$ ][ $\pi^*\pi^*_{CO(1)}$ ] | 1- 58%                                       | 2- 34% |

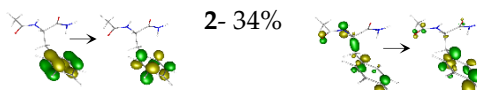

[a] The theoretical values are given with the number of significant digits obtained in the experiment. [b] In the event of several couples of NTOs, only those whose contribution to the wave function is greater than 10% are taken into account and reported. The nature of the states is determined from these contributions. [c] Only the couples of NTOs that differ from the CC2 ones are drawn.

**Table S3b.** Nature and vertical excitation energies of the five lowest excited states of Fa B.

| Fa B           | E <sub>vert</sub> <sup>[a]</sup> (eV) | Nature of the state <sup>[b]</sup>                                               | NTOs (% , occupied→virtual) <sup>[b,c]</sup> |               |
|----------------|---------------------------------------|----------------------------------------------------------------------------------|----------------------------------------------|---------------|
| S <sub>1</sub> | 5.504                                 | $\pi\pi^*$                                                                       | 1- 54%                                       | 2- 45%        |
| S <sub>2</sub> | 5.674                                 | $n\pi^*_{CO(2)}$                                                                 | 1- 99%                                       |               |
| S <sub>3</sub> | 5.787                                 | $n\pi^*_{CO(1)}$                                                                 | 1- 100%                                      |               |
| S <sub>4</sub> | 6.261                                 | $\pi\pi^*$                                                                       | 1- 59%                                       | 2- 38%        |
| S <sub>5</sub> | 7.143                                 | $\pi\pi^* +$<br>[ $n_{(1,2)}\pi$ ][ $\pi^*\pi^*_{CO(1)}$ ]<br>+ $n\pi^*_{CO(1)}$ | 1- 48%                                       | 2- 36% 3- 11% |

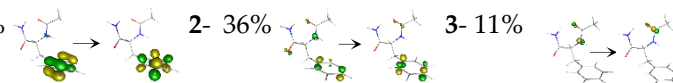

[a], [b] and [c] Same details as Table S3a.

**Table S3c.** Nature and vertical excitation energies of the five lowest excited states of Fa C.

| Fa C           | E <sub>vert</sub> <sup>[a]</sup> (eV) | Nature of the state <sup>[b]</sup> | NTOs (% , occupied→virtual) <sup>[b,c]</sup> |        |
|----------------|---------------------------------------|------------------------------------|----------------------------------------------|--------|
| S <sub>1</sub> | 5.492                                 | $\pi\pi^*$                         | 1- 57%                                       | 2- 42% |
| S <sub>2</sub> | 5.645                                 | $n\pi^*_{CO(2)}$                   | 1- 99%                                       |        |
| S <sub>3</sub> | 5.836                                 | $n\pi^*_{CO(1)}$                   | 1- 100%                                      |        |
| S <sub>4</sub> | 6.262                                 | $\pi\pi^*$                         | 1- 59%                                       | 2- 38% |
| S <sub>5</sub> | 7.175                                 | $\pi\pi^*$                         | 1- 54%                                       | 2- 35% |

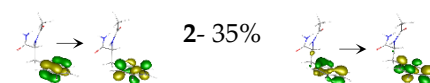

[a], [b] and [c] Same details as Table S3a.

**Table S3d.** Nature and vertical excitation energies of the five lowest excited states of Fa D.

| Fa D           | E <sub>vert</sub> <sup>[a]</sup> (eV) | Nature of the state <sup>[b]</sup> | NTOs (% , occupied→virtual) <sup>[b,c]</sup> |        |
|----------------|---------------------------------------|------------------------------------|----------------------------------------------|--------|
| S <sub>1</sub> | 5.509                                 | $\pi\pi^*$                         | 1- 54%                                       | 2- 46% |
| S <sub>2</sub> | 5.622                                 | $n\pi^*_{CO(2)}$                   | 1- 99%                                       |        |
| S <sub>3</sub> | 5.773                                 | $n\pi^*_{CO(1)}$                   | 1- 100%                                      |        |
| S <sub>4</sub> | 6.271                                 | $\pi\pi^*$                         | 1- 60%                                       | 2- 37% |
| S <sub>5</sub> | 7.199                                 | $\pi\pi^* + [\pi n_{(1,2)}]\pi^*$  | 1- 55%                                       | 2- 35% |

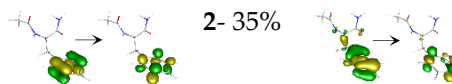

[a], [b] and [c] Same details as Table S3a.

**Table S3e.** Variation of the nature and vertical excitation energies of the five lowest excited states of Fa B according the value of  $\omega$  (0.45-0.25 bohr<sup>-1</sup>).

| LC- $\omega$ PBE<br>$\omega$ (bohr <sup>-1</sup> )             | S <sub>1</sub>             | S <sub>2</sub>                  | S <sub>3</sub>                   | S <sub>4</sub>                                                     | S <sub>5</sub>                                                                             |
|----------------------------------------------------------------|----------------------------|---------------------------------|----------------------------------|--------------------------------------------------------------------|--------------------------------------------------------------------------------------------|
| Nature of the excitation and contribution to the wave function |                            |                                 |                                  |                                                                    |                                                                                            |
| 0.25                                                           | 5.328<br>$\pi\pi^*$ , 100% | 5.462<br>$n\pi^*_{CO(2)}$ , 99% | 5.573<br>$n\pi^*_{CO(1)}$ , 100% | 6.149<br>CT <sub>12</sub> , <sup>[a]</sup> 73%<br>$\pi\pi^*$ , 25% | 6.422<br>CT <sub>12</sub> , <sup>[b]</sup> 82%<br>$\pi\pi^*$ , 16%                         |
| 0.30                                                           | 5.390<br>$\pi\pi^*$ , 100% | 5.535<br>$n\pi^*_{CO(2)}$ , 99% | 5.641<br>$n\pi^*_{CO(1)}$ , 100% | 6.230<br>$\pi\pi^*$ , 98%                                          | 6.827<br>CT <sub>12</sub> , <sup>[c]</sup> 73%<br>$\pi\pi^*$ , 19%                         |
| 0.35                                                           | 5.449<br>$\pi\pi^*$ , 100% | 5.605<br>$n\pi^*_{CO(2)}$ , 99% | 5.712<br>$n\pi^*_{CO(1)}$ , 100% | 6.257<br>$\pi\pi^*$ , 97%                                          | 7.038<br>CT <sub>12</sub> , <sup>[c]</sup> 50%<br>$\pi\pi^*$ , 35%                         |
| 0.40                                                           | 5.504<br>$\pi\pi^*$ , 100% | 5.674<br>$n\pi^*_{CO(2)}$ , 98% | 5.787<br>$n\pi^*_{CO(1)}$ , 99%  | 6.261<br>$\pi\pi^*$ , 98%                                          | 7.143<br>$\pi\pi^*$ , 48%<br>CT <sub>12</sub> , <sup>[c]</sup> 36%<br>$n\pi^*_{CO(1)}$ 11% |
| 0.45                                                           | 5.554<br>$\pi\pi^*$ , 100% | 5.744<br>$n\pi^*_{CO(2)}$ , 99% | 5.865<br>$n\pi^*_{CO(1)}$ , 100% | 6.251<br>$\pi\pi^*$ , 97%                                          | 7.213<br>$\pi\pi^*$ , 87%                                                                  |

[a]CT<sub>12</sub>: charge transfer [ $n_{(1,2)}\pi$ ] $\pi^*$  excited states.

[b] CT<sub>12</sub>: charge transfer  $n_{(1,2)}\pi^*$  excited states.

[c]CT<sub>12</sub>: charge transfer [ $n_{(1,2)}\pi$ ][ $\pi^* \pi^*_{CO(1)}$ ] excited states.

**Table S3f.** Mean absolute error (MAE) and mean signed error (ME) (eV) between CC2 and TD-DFT level on the vertical excitation energies of the first four low-lying excited states for the conformers A and B.

| $\omega$ (bohr <sup>-1</sup> ) | MAE (eV) | ME(eV) |
|--------------------------------|----------|--------|
| 0.25                           | 0.28     | -0.24  |
| 0.30                           | 0.24     | -0.17  |
| 0.35                           | 0.23     | -0.10  |
| 0.40                           | 0.19     | -0.07  |
| 0.45                           | 0.17     | -0.02  |

**S4: Nature and CAM-B3LYP/cc-pVDZ vertical excitation energies of the five lowest excited states of Fa A-D at the B97-D2/TZVPP optimized geometry of the ground state.**

**Table S4a.** Nature and vertical excitation energies of the five lowest excited states of Fa A.

| Fa A           | E <sub>vert</sub> <sup>[a]</sup> (eV) | Nature of the state <sup>[b]</sup>              | NTOs (% , occupied→virtual) <sup>[b,c]</sup> |        |
|----------------|---------------------------------------|-------------------------------------------------|----------------------------------------------|--------|
| S <sub>1</sub> | 5.423                                 | $\pi\pi^*$                                      | 1- 58%                                       | 2- 41% |
| S <sub>2</sub> | 5.722                                 | $n\pi^*_{CO(1)}$                                | 1- 98%                                       |        |
| S <sub>3</sub> | 5.807                                 | $n\pi^*_{CO(2)}$                                | 1- 96%                                       |        |
| S <sub>4</sub> | 6.086                                 | $\pi\pi^*$                                      | 1- 66%                                       | 2- 29% |
| S <sub>5</sub> | 6.812                                 | $n_{(1)}[\pi^*\pi^*_{CO(1,2)}]$<br>+ $\pi\pi^*$ | 1- 66%                                       | 2- 30% |

[a], [b] and [c] Same details as Table S3a.

**Table S4b.** Nature and vertical excitation energies of the five lowest excited states of Fa B.

| Fa B           | E <sub>vert</sub> <sup>[a]</sup> (eV) | Nature of the state <sup>[b]</sup>              | NTOs (% , occupied→virtual) <sup>[b,c]</sup> |        |
|----------------|---------------------------------------|-------------------------------------------------|----------------------------------------------|--------|
| S <sub>1</sub> | 5.450                                 | $\pi\pi^*$                                      | 1- 55%                                       | 2- 44% |
| S <sub>2</sub> | 5.623                                 | $n\pi^*_{CO(2)}$                                | 1- 99%                                       |        |
| S <sub>3</sub> | 5.765                                 | $n\pi^*_{CO(1)}$                                | 1- 100%                                      |        |
| S <sub>4</sub> | 6.135                                 | $\pi\pi^*$                                      | 1- 62%                                       | 2- 36% |
| S <sub>5</sub> | 6.750                                 | $n_{(1,2)}[\pi^*\pi^*_{CO(1)}]$<br>+ $\pi\pi^*$ | 1- 82%                                       | 2- 14% |

[a], [b] and [c] Same details as Table S3a.

**Table S4c.** Nature and vertical excitation energies of the five lowest excited states of Fa C.

| Fa C           | E <sub>vert</sub> <sup>[a]</sup> (eV) | Nature of the state <sup>[b]</sup> | NTOs (% , occupied→virtual) <sup>[b,c]</sup> |        |
|----------------|---------------------------------------|------------------------------------|----------------------------------------------|--------|
| S <sub>1</sub> | 5.438                                 | $\pi\pi^*$                         | 1- 58%                                       | 2- 42% |
| S <sub>2</sub> | 5.608                                 | $n\pi^*_{CO(2)}$                   | 1- 99%                                       |        |
| S <sub>3</sub> | 5.813                                 | $n\pi^*_{CO(1)}$                   | 1- 99%                                       |        |
| S <sub>4</sub> | 6.139                                 | $\pi\pi^*$                         | 1- 61%                                       | 2- 37% |
| S <sub>5</sub> | 6.845                                 | $n_{(1,2)}[\pi^*\pi^*_{CO(1)}]$    | 1- 93%                                       |        |

[a], [b] and [c] Same details as Table S3a.



**Table S4d.** Nature and vertical excitation energies of the five lowest excited states of Fa D.

| Fa D           | E <sub>vert</sub> <sup>[a]</sup> (eV) | Nature of the state <sup>[b]</sup>               | NTOs (% , occupied→virtual) <sup>[b,c]</sup> |                |
|----------------|---------------------------------------|--------------------------------------------------|----------------------------------------------|----------------|
| S <sub>1</sub> | 5.457                                 | $\pi\pi^*$                                       | <b>1</b> - 54%                               | <b>2</b> - 45% |
| S <sub>2</sub> | 5.587                                 | $n\pi^*_{CO(2)}$                                 | <b>1</b> - 99%                               |                |
| S <sub>3</sub> | 5.752                                 | $n\pi^*_{CO(1)}$                                 | <b>1</b> - 100%                              |                |
| S <sub>4</sub> | 6.149                                 | $\pi\pi^*$                                       | <b>1</b> - 62%                               | <b>2</b> - 35% |
| S <sub>5</sub> | 6.969                                 | $n_{(1,2)} [\pi^*\pi^*_{CO(1)}]$<br>+ $\pi\pi^*$ | <b>1</b> - 60%                               | <b>2</b> - 33% |

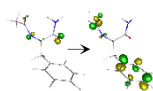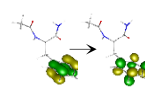

[a], [b] and [c] Same details as Table S3a.

**S5: Nature and  $\omega$ B97X-D/cc-pVDZ vertical excitation energies of the five lowest excited states of Fa A-D at the B97-D2/TZVPP optimized geometry of the ground state.**

**Table S5a.** Nature and vertical excitation energies of the five lowest excited states of Fa A.

| Fa A           | E <sub>vert</sub> <sup>[a]</sup> (eV) | Nature of the state <sup>[b]</sup>         | NTOs (% , occupied→virtual) <sup>[b,c]</sup> |        |
|----------------|---------------------------------------|--------------------------------------------|----------------------------------------------|--------|
| S <sub>1</sub> | 5.424                                 | $\pi\pi^*$                                 | 1- 58%                                       | 2- 42% |
| S <sub>2</sub> | 5.747                                 | $n\pi^*_{CO(1)}$                           | 1- 98%                                       |        |
| S <sub>3</sub> | 5.827                                 | $n\pi^*_{CO(2)}$                           | 1- 96%                                       |        |
| S <sub>4</sub> | 6.099                                 | $\pi\pi^*$                                 | 1- 66%                                       | 2- 29% |
| S <sub>5</sub> | 6.836                                 | $n_{(1)}[\pi^*\pi^*_{CO(1,2)} + \pi\pi^*]$ | 1- 64%                                       | 2- 32% |

[a], [b] and [c] Same details as Table S3a.

**Table S5b.** Nature and vertical excitation energies of the five lowest excited states of Fa B.

| Fa B           | E <sub>vert</sub> <sup>[a]</sup> (eV) | Nature of the state <sup>[b]</sup>         | NTOs (% , occupied→virtual) <sup>[b,c]</sup> |        |
|----------------|---------------------------------------|--------------------------------------------|----------------------------------------------|--------|
| S <sub>1</sub> | 5.451                                 | $\pi\pi^*$                                 | 1- 55%                                       | 2- 45% |
| S <sub>2</sub> | 5.640                                 | $n\pi^*_{CO(2)}$                           | 1- 99%                                       |        |
| S <sub>3</sub> | 5.791                                 | $n\pi^*_{CO(1)}$                           | 1- 100%                                      |        |
| S <sub>4</sub> | 6.148                                 | $\pi\pi^*$                                 | 1- 62%                                       | 2- 36% |
| S <sub>5</sub> | 6.785                                 | $n_{(1,2)}[\pi^*\pi^*_{CO(1)} + \pi\pi^*]$ | 1- 80%                                       | 2- 15% |

[a], [b] and [c] Same details as Table S3a.

**Table S5c.** Nature and vertical excitation energies of the five lowest excited states of Fa C.

| Fa C           | E <sub>vert</sub> <sup>[a]</sup> (eV) | Nature of the state <sup>[b]</sup>         | NTOs (% , occupied→virtual) <sup>[b,c]</sup> |        |
|----------------|---------------------------------------|--------------------------------------------|----------------------------------------------|--------|
| S <sub>1</sub> | 5.439                                 | $\pi\pi^*$                                 | 1- 58%                                       | 2- 42% |
| S <sub>2</sub> | 5.623                                 | $n\pi^*_{CO(2)}$                           | 1- 99%                                       |        |
| S <sub>3</sub> | 5.842                                 | $n\pi^*_{CO(1)}$                           | 1- 99%                                       |        |
| S <sub>4</sub> | 6.152                                 | $\pi\pi^*$                                 | 1- 60%                                       | 2- 37% |
| S <sub>5</sub> | 6.948                                 | $n_{(1,2)}[\pi^*\pi^*_{CO(1)} + \pi\pi^*]$ | 1- 89%                                       | 2- 10% |

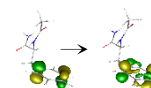

[a], [b] and [c] Same details as Table S3a.

**Table S5d.** Nature and vertical excitation energies of the five lowest excited states of Fa D.

| Fa D           | E <sub>vert</sub> <sup>[a]</sup> (eV) | Nature of the state <sup>[b]</sup>                                       | NTOs (% , occupied→virtual) <sup>[b,c]</sup> |               |
|----------------|---------------------------------------|--------------------------------------------------------------------------|----------------------------------------------|---------------|
| S <sub>1</sub> | 5.457                                 | $\pi\pi^*$                                                               | <b>1-</b> 54%                                | <b>2-</b> 45% |
| S <sub>2</sub> | 5.598                                 | $n\pi^*_{CO(2)}$                                                         | <b>1-</b> 99%                                |               |
| S <sub>3</sub> | 5.778                                 | $n\pi^*_{CO(1)}$                                                         | <b>1-</b> 100%                               |               |
| S <sub>4</sub> | 6.161                                 | $\pi\pi^*$                                                               | <b>1-</b> 62%                                | <b>2-</b> 36% |
| S <sub>5</sub> | 6.998                                 | $n_{(1,2)} [\pi^*\pi^*_{CO(1)}]$<br>+ $[n_{(2)}\pi][\pi^*\pi^*_{CO(2)}]$ | <b>1-</b> 54%                                | <b>2-</b> 37% |

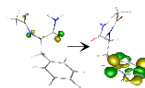

[a], [b] and [c] Same details as Table S3a.

**S6: Characteristic geometrical parameters of the ground state ( $S_0$ ) and the lowest excited state ( $S_1$ ) of the four Fa A-D conformers and comparison of their CC2/cc-pVDZ optimized geometries<sup>3</sup> with those obtained at the TD-DFT level.**

**Table S6a:** Characteristic geometrical parameters of the ground state ( $S_0$ ) and the lowest  $\pi\pi^*$  excited state ( $S_1$ ) of the four Fa A-D conformers optimized at the CC2/cc-pVDZ level.

|       |   | Dihedral angles ( $^\circ$ ) <sup>[a]</sup> |        |          | Intramolecular distances ( $\text{\AA}$ ) |                                        |
|-------|---|---------------------------------------------|--------|----------|-------------------------------------------|----------------------------------------|
|       |   | $\Phi$                                      | $\Psi$ | $\chi^1$ | $d_{\text{NH}\dots\text{O}}$              | $d_{\text{NH}\dots\pi}$ <sup>[b]</sup> |
| $S_1$ | A | -164                                        | 155    | 182      | 2.22                                      | 2.51 (2.92, 2.63)                      |
|       | B | -83                                         | 52     | 45       | 1.95                                      | 2.37 (3.30, 2.35)                      |
|       | C | -88                                         | 79     | -50      | 1.99                                      | 2.52 (3.48, 2.53)                      |
|       | D | -81                                         | 84     | 192      | 2.06                                      |                                        |
| $S_0$ | A | -159                                        | 168    | 201      | 2.15                                      | 2.45 (2.54, 3.10)                      |
|       | B | -82                                         | 53     | 44       | 1.96                                      | 2.37 (3.16, 2.49)                      |
|       | C | -88                                         | 80     | -51      | 1.98                                      | 2.56 (3.46, 2.70)                      |
|       | D | -80                                         | 85     | 192      | 2.06                                      |                                        |

[a] For the definition of the dihedral angles, see Figure S1b.

[b] The  $\text{NH}\dots\pi$  bond is characterized by three distances: the distance of the  $\text{NH}_{\text{Phe}}$  (A conformer) or  $\text{NH}_2$  (B conformer and C conformer) hydrogen atom with the  $\text{C}_\gamma$  carbon atom of the phenylalanine residue and given in parentheses by the two distances with the two  $\text{C}_\delta$  carbon atoms ( $\text{C}_\delta^{\text{C-term}}$ ,  $\text{C}_\delta^{\text{N-term}}$ ) of the phenylalanine residue.

**Table S6b:** Characteristic geometrical parameters of the ground state ( $S_0$ ) and the lowest  $\pi\pi^*$  excited states of the four Fa A-D conformers optimized at the CAM-B3LYP/cc-pVDZ level.

|       |   | Dihedral angles ( $^\circ$ ) <sup>[a]</sup> |        |          | Intramolecular distances ( $\text{\AA}$ ) |                                        |
|-------|---|---------------------------------------------|--------|----------|-------------------------------------------|----------------------------------------|
|       |   | $\Phi$                                      | $\Psi$ | $\chi^1$ | $d_{\text{NH}\dots\text{O}}$              | $d_{\text{NH}\dots\pi}$ <sup>[b]</sup> |
| $S_1$ | A | -160                                        | 177    | 208      | 2.09                                      | 2.52 (2.49, 3.38)                      |
|       | B | -82                                         | 56     | 45       | 1.92                                      | 2.42 (3.33, 2.48)                      |
|       | C | -84                                         | 71     | -53      | 1.93                                      | 2.67 (3.66, 2.76)                      |
|       | D | -82                                         | 76     | 198      | 2.00                                      |                                        |
| $S_0$ | A | -159                                        | 173    | 206      | 2.10                                      | 2.57 (2.61, 3.32)                      |
|       | B | -82                                         | 57     | 43       | 1.93                                      | 2.42 (3.16, 2.65)                      |
|       | C | -84                                         | 71     | -54      | 1.94                                      | 2.74 (3.68, 2.91)                      |
|       | D | -82                                         | 77     | 197      | 2.00                                      |                                        |

[a] and [b] Same details as S6a.

**Table S6c:** Characteristic geometrical parameters of the ground state ( $S_0$ ) and the lowest  $\pi\pi^*$  excited state ( $S_1$ ) of the four Fa A-D conformers optimized at the  $\omega$ B97XD/cc-pVDZ level.

|       |   | Dihedral angles ( $^\circ$ ) <sup>[a]</sup> |        |          | Intramolecular distances ( $\text{\AA}$ ) |                                         |
|-------|---|---------------------------------------------|--------|----------|-------------------------------------------|-----------------------------------------|
|       |   | $\Phi$                                      | $\Psi$ | $\chi^1$ | $d_{\text{NH}\cdots\text{O}}$             | $d_{\text{NH}\cdots\pi}$ <sup>[b]</sup> |
| $S_1$ | A | -162                                        | 161    | 186      | 2.16                                      | 2.52 (2.94, 2.70)                       |
|       | B | -83                                         | 54     | 44       | 1.96                                      | 2.40 (3.26, 2.46)                       |
|       | C | -87                                         | 71     | -51      | 1.97                                      | 2.60 (3.56, 2.67)                       |
|       | D | -82                                         | 79     | 196      | 2.06                                      |                                         |
| $S_0$ | A | -158                                        | 169    | 202      | 2.12                                      | 2.53 (2.62, 3.17)                       |
|       | B | -82                                         | 55     | 42       | 1.96                                      | 2.40 (3.12, 2.60)                       |
|       | C | -87                                         | 72     | -52      | 1.99                                      | 2.56 (3.57, 2.83)                       |
|       | D | -82                                         | 80     | 195      | 2.06                                      |                                         |

[a], [b] and [c] Same details as Table S3a.

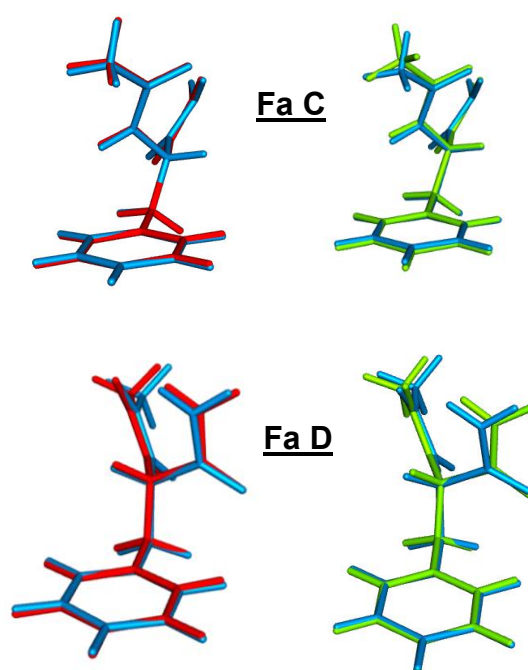

**Figure S6.** Comparison of the CC2/cc-pVDZ (blue) and  $\omega$ B97XD/cc-pVDZ (red) as well as the CC2/cc-pVDZ (blue) and the CAM-B3LYP/cc-pVDZ (green) optimized geometries of the  $S_1$  state for Fa C and D. For each conformer, the phenyl rings have been overlapped.

**S7: Amide A region frequencies of both the ground ( $S_0$ ) and  $\pi\pi^*$  excited ( $S_1$ ) states of Fa A-D.**

**Table S7a:** CC2/cc-pVDZ *amide A* region frequencies ( $\text{cm}^{-1}$ ) of both the ground ( $S_0$ ) and  $\pi\pi^*$  excited ( $S_1$ ) states of Fa A-D,<sup>3</sup> together with the available experimental ones.

| Conformer/State   |       | NH <sub>phe</sub> | NH <sub>2 sym.</sub> | NH <sub>2 anti.</sub> |
|-------------------|-------|-------------------|----------------------|-----------------------|
| Fa A              | $S_1$ | 3594              | 3546                 | 3695                  |
|                   | $S_0$ | 3583              | 3561                 | 3713                  |
| Fa B              | $S_1$ | 3545              | 3469                 | 3689                  |
|                   | $S_0$ | 3589              | 3474                 | 3690                  |
| Fa C              | $S_1$ | 3553              | 3473                 | 3674                  |
|                   | $S_0$ | 3597              | 3476                 | 3675                  |
| Fa D              | $S_1$ | 3618              | 3498                 | 3677                  |
|                   | $S_0$ | 3618              | 3500                 | 3677                  |
| <b>Experiment</b> |       |                   |                      |                       |
| Fa A              | $S_1$ | 3434              | 3417                 | 3535                  |
|                   | $S_0$ | 3433              | 3426                 | 3541                  |
| Fa B              | $S_0$ | 3438              | 3342                 | 3516                  |
| Fa C              | $S_1$ | 3439              | 3344                 | 3514                  |
|                   | $S_0$ | 3463              | 3345                 | 3515                  |
| Fa D              | $S_0$ | 3472              | 3375                 | 3516                  |

**Table S7b:** CAM-B3LYP/cc-pVDZ *amide A* region frequencies ( $\text{cm}^{-1}$ ) of both the ground ( $S_0$ ) and  $\pi\pi^*$  excited ( $S_1$ ) states of Fa A-D.

| Conformer/State |       | NH <sub>phe</sub> | NH <sub>2 sym.</sub> | NH <sub>2 anti.</sub> |
|-----------------|-------|-------------------|----------------------|-----------------------|
| Fa A            | $S_1$ | 3585              | 3557                 | 3705                  |
|                 | $S_0$ | 3591              | 3586                 | 3727                  |
| Fa B            | $S_1$ | 3576              | 3463                 | 3687                  |
|                 | $S_0$ | 3620              | 3468                 | 3689                  |
| Fa C            | $S_1$ | 3607              | 3468                 | 3682                  |
|                 | $S_0$ | 3645              | 3476                 | 3683                  |
| Fa D            | $S_1$ | 3643              | 3495                 | 3682                  |
|                 | $S_0$ | 3644              | 3495                 | 3682                  |

**Table S7c:**  $\omega$ B97XD/cc-pVDZ *amide A* region frequencies ( $\text{cm}^{-1}$ ) of both the ground ( $S_0$ ) and  $\pi\pi^*$  excited ( $S_1$ ) states of Fa A-D.

| Conformer/State |                | NH <sub>phe</sub> | NH <sub>2 sym.</sub> | NH <sub>2 anti.</sub> |
|-----------------|----------------|-------------------|----------------------|-----------------------|
| Fa A            | S <sub>1</sub> | 3626              | 3591                 | 3737                  |
|                 | S <sub>0</sub> | 3616              | 3600                 | 3745                  |
| Fa B            | S <sub>1</sub> | 3609              | 3493                 | 3712                  |
|                 | S <sub>0</sub> | 3634              | 3499                 | 3715                  |
| Fa C            | S <sub>1</sub> | 3609              | 3508                 | 3712                  |
|                 | S <sub>0</sub> | 3653              | 3510                 | 3710                  |
| Fa D            | S <sub>1</sub> | 3661              | 3522                 | 3707                  |
|                 | S <sub>0</sub> | 3662              | 3529                 | 3708                  |

**S8: Characteristic geometrical parameters of CC2/<sup>3</sup> and ωB97XD/cc-pVXZ optimized geometries of both the ground (S<sub>0</sub>) and lowest ππ\* excited (S<sub>1</sub>) states of the GFa A, FFa A<sub>1</sub>, A<sub>2</sub>, C and QFa A, C conformers.**

**Table S8a:** Characteristic geometrical parameters of CC2/ and ωB97XD/cc-pVDZ optimized geometries of both the ground (S<sub>0</sub>) and lowest ππ\* excited (S<sub>1</sub>) states of the GFa conformers.

| GFa    |                | Dihedral angles (°) <sup>[a]</sup> |                |                             | Dihedral angles (°) |                |                             | Intramolecular distances (Å)       |                                    |
|--------|----------------|------------------------------------|----------------|-----------------------------|---------------------|----------------|-----------------------------|------------------------------------|------------------------------------|
|        |                | Φ <sub>1</sub>                     | Ψ <sub>1</sub> | χ <sub>1</sub> <sup>1</sup> | Φ <sub>2</sub>      | Ψ <sub>2</sub> | χ <sub>2</sub> <sup>1</sup> | d <sub>NH...O</sub> <sup>[b]</sup> | d <sub>NH...π</sub> <sup>[c]</sup> |
| CC2    | S <sub>0</sub> | A                                  | -81            | 67                          | -84                 | 79             | -59                         | 1.96 - 1.99                        | 2.87 (3.86, 3.03)                  |
|        |                | B'                                 | 56             | -140                        | -100                | 14             | 55                          | 2.01                               | 2.64 (3.47, 2.67)                  |
|        | S <sub>1</sub> | A                                  | -80            | 71                          | -86                 | 78             | -55                         | 1.95 - 1.98                        | 2.70 (3.54, 3.06)                  |
|        |                | B'                                 | 56             | -140                        | -95                 | 10             | 57                          | 2.01                               | 2.60 (3.50, 2.56)                  |
| ωB97XD | S <sub>0</sub> | A                                  | -81            | 64                          | -85                 | 71             | -59                         | 1.98 - 2.00                        | 2.90 (3.87, 3.08)                  |
|        |                | B'                                 | 59             | -134                        | -101                | 16             | 54                          | 1.99                               | 2.68 (3.47, 2.77)                  |
|        | S <sub>1</sub> | A                                  | -80            | 66                          | -87                 | 69             | -54                         | 1.96 - 1.99                        | 2.73 (3.48, 3.20)                  |
|        |                | B'                                 | 59             | -134                        | -98                 | 13             | 55                          | 1.99                               | 2.66 (3.49, 2.71)                  |

[a] For the definition of the dihedral angles, see Figure S1b. The residue 1 correspond to the first residue from the N terminal cap, the N-term.

[b] A conformer: the two distances correspond to the two C<sub>7</sub> hydrogen bond distances. B' conformer, the distances is that of the C<sub>10</sub> H-bond. C conformer: the two distances correspond to the two C<sub>5</sub> H-bond distances.

[c] The NH...π bond is characterized by three distances: the distance of NH<sub>phe</sub> (A or B' conformer) with the C<sub>γ</sub> carbon atom of the phenylalanine residue and given in parentheses by the two distances with the two C<sub>δ</sub> carbon atoms (C<sub>δ</sub><sup>to C-term</sup>, C<sub>δ</sub><sup>to N-term</sup>) of the phenylalanine residue.



**Table S8a:** Characteristic geometrical parameters of CC2 and  $\omega$ B97XD/cc-pVXZ optimized geometries of both the ground ( $S_0$ ) and lowest  $\pi\pi^*$  excited ( $S_1$ ) states of the FFa A1, A2 and C conformers.

| FFa   |                | Dihedral angles ( $^\circ$ ) <sup>[a]</sup> |          |            | Dihedral angles ( $^\circ$ ) |          |            | Intramolecular distances ( $\text{\AA}$ ) |                                       |
|-------|----------------|---------------------------------------------|----------|------------|------------------------------|----------|------------|-------------------------------------------|---------------------------------------|
|       |                | $\Phi_1$                                    | $\Psi_1$ | $\chi_1^1$ | $\Phi_2$                     | $\Psi_2$ | $\chi_2^1$ | $d_{\text{NH}\dots\text{O}}^{[b]}$        | $d_{\text{NH}\dots\pi}^{[c]}$         |
| $S_0$ | A              | -69                                         | 353      | 62         | -110                         | 14       | 51         | 2.15                                      | [2.62, 2.54] - [2.42, 2.41]           |
|       | C              | -163                                        | 151      | 181        | -80                          | 70       | 45         | 1.99 - 2.24                               | 2.60 (2.94, 2.74) - 2.49 (3.41, 2.50) |
| $S_1$ | A <sub>1</sub> | -68                                         | 349      | 61         | -103                         | 12       | 52         | 2.10                                      | [2.59, 2.47] - [2.43, 2.41]           |
|       | A <sub>2</sub> | -69                                         | 352      | 62         | -111                         | 12       | 50         | 2.17                                      | [2.63, 2.56] - [2.38, 2.33]           |
|       | C              | -160                                        | 161      | 182        | -73                          | 67       | 41         | 1.96 - 2.21                               | 2.46 (2.62, 3.15) - 2.24 (3.23, 2.17) |
| $S_0$ | A              | -69                                         | 351      | 61         | -106                         | 12       | 50         | 2.14                                      | [2.64, 2.58] - [2.44, 2.47]           |
|       | C              | -159                                        | 155      | 184        | -82                          | 59       | 47         | 2.03 - 2.20                               | 2.61 (2.91, 2.85) - 2.53 (3.47, 2.60) |
| $S_1$ | A <sub>1</sub> | -69                                         | 350      | 60         | -103                         | 11       | 50         | 2.11                                      | [2.61, 2.52] - [2.44, 2.49]           |
|       | A <sub>2</sub> | -69                                         | 351      | 62         | -107                         | 12       | 48         | 2.16                                      | [2.67, 2.61] - [2.39, 2.42]           |
|       | C              | -161                                        | 161      | 185        | -75                          | 59       | 41         | 1.99 - 2.19                               | 2.53 (2.73, 3.15) - 2.29 (3.21, 2.28) |

[a] For the definition of the dihedral angles, see Figure S1b. The residue 1 correspond to the first residue from the N-term.

[b] A, A<sub>1</sub> and A<sub>2</sub> conformers: the distance corresponds to the C<sub>10</sub> hydrogen bond distances. B, B<sub>1</sub> and B<sub>2</sub> conformers, the distance is that of the C<sub>7</sub> H-bond. C conformer: the distances correspond to the C<sub>7</sub> and the C<sub>5</sub> H-bond distances.

[c] The NH... $\pi$  bond is characterized by two group of distances. A conformer: the distances of the NH<sub>Phe1</sub> hydrogen atom with the C <sub>$\gamma$</sub>  and the C <sub>$\delta^{\text{to N-term}}$</sub>  carbon atoms of Phe1 and those of the NH<sub>Phe2</sub> hydrogen atom with the C <sub>$\gamma$</sub>  and the C <sub>$\delta^{\text{to N-term}}$</sub>  carbon atoms of Phe2. C conformer: the distances of the NH<sub>Phe2</sub> hydrogen atom with the C <sub>$\gamma$</sub>  and the two C <sub>$\delta$</sub>  carbon atoms (C <sub>$\delta^{\text{to C-term}}$</sub>  and C <sub>$\delta^{\text{to N-term}}$</sub> ) of Phe1 and those of the same hydrogen atom with the C <sub>$\gamma$</sub>  and the two C <sub>$\delta$</sub>  carbon atoms (C <sub>$\delta^{\text{to C-term}}$</sub>  and C <sub>$\delta^{\text{to N-term}}$</sub> ) carbon atoms of Phe2.

**Table S8c:** Characteristic geometrical parameters of CC2/ and  $\omega$ B97XD/cc-pVXZ optimized geometries of both the ground ( $S_0$ ) and lowest  $\pi\pi^*$  excited ( $S_1$ ) states of the QFa A and C conformers.

| QFa    |                | Dihedral angles (°) <sup>[a]</sup> |                |                             |                | Dihedral angles (°) |                             |                                    | Intramolecular distances (Å)       |                   |
|--------|----------------|------------------------------------|----------------|-----------------------------|----------------|---------------------|-----------------------------|------------------------------------|------------------------------------|-------------------|
|        |                | Φ <sub>1</sub>                     | Ψ <sub>1</sub> | χ <sub>1</sub> <sup>1</sup> | Φ <sub>2</sub> | Ψ <sub>2</sub>      | χ <sub>2</sub> <sup>1</sup> | d <sub>NH...O</sub> <sup>[b]</sup> | d <sub>NH...π</sub> <sup>[c]</sup> |                   |
| CC2    | S <sub>0</sub> | A                                  | -74            | 349                         | -63            | -93                 | 10                          | 53                                 | 1.82 - 2.00                        | 2.33 (3.25, 2.47) |
|        |                | C                                  | -69            | 343                         | 71             | -96                 | 14                          | 51                                 | 1.85 - 1.99                        | 2.43 (3.19, 2.43) |
|        | S <sub>1</sub> | A                                  | -65            | 340                         | -58            | -106                | 15                          | 47                                 | 1.83 - 2.06                        | 2.37 (3.07, 2.35) |
|        |                | C                                  | -69            | 342                         | 69             | -97                 | 14                          | 48                                 | 1.85 - 2.00                        | 2.39 (3.11, 2.39) |
| ωB97XD | S <sub>0</sub> | A                                  | -74            | 352                         | -63            | -92                 | 5                           | 53                                 | 1.85 - 2.00                        | 2.50 (3.33, 2.52) |
|        |                | C                                  | -68            | 345                         | 75             | -97                 | 10                          | 50                                 | 1.86 - 2.00                        | 2.46 (3.24, 2.48) |
|        | S <sub>1</sub> | A                                  | -74            | 350                         | -64            | -90                 | 5                           | 53                                 | 1.85 - 1.99                        | 2.48 (3.33, 2.46) |
|        |                | C                                  | -67            | 343                         | 72             | -97                 | 11                          | 48                                 | 1.85 - 2.00                        | 2.42 (3.15, 2.44) |

[a] For the definition of the dihedral angles, see Figure S1b. The residue 1 correspond to the first residue from the N-term.

[b] The two distances correspond to the C<sub>7</sub> and C<sub>10</sub> H-bond distances.

[c] The NH... $\pi$  bond is characterized by three distances: the distance of the NH<sub>Phe</sub> with the C <sub>$\gamma$</sub>  carbon atom of the phenylalanine residue and in parentheses, the two distances with the two C <sub>$\delta$</sub>  carbon atoms (C <sub>$\delta^{\text{to C-term}}$</sub> , C <sub>$\delta^{\text{to N-term}}$</sub> ) of the phenylalanine residue.

**S9: NTOs of the lowest  $\pi\pi^*$  excited states ( $S_1$ ) of GFa A, B', FFa A<sub>1</sub>, A<sub>2</sub>, C and QFa A,C at their CC2 and  $\omega$ B97XD/cc-pVDZ optimized geometries.**

**Table S9.** : NTOs of the lowest  $\pi\pi^*$  excited states ( $S_1$ ) of GFa A and B at their CC2 and  $\omega$ B97XD/cc-pVDZ optimized geometries.

| NTOs (% , occupied→virtual) <sup>[a]</sup> |                |        |        |        |        |
|--------------------------------------------|----------------|--------|--------|--------|--------|
| CC2                                        |                |        |        | ωB97XD |        |
| GFa                                        |                |        |        |        |        |
|                                            | A              | 1- 58% | 2- 42% | 1- 61% | 2- 39% |
|                                            | B              | 1- 55% | 2- 45% | 1- 57% | 2- 42% |
| FFa                                        |                |        |        |        |        |
|                                            | A <sub>1</sub> | 1- 57% | 2- 43% | 1- 59% | 2- 40% |
|                                            | A <sub>2</sub> | 1- 54% | 2- 46% | 1- 58% | 2- 41% |
|                                            | C              | 1- 49% | 2- 43% | 1- 62% | 2- 30% |
| QFa                                        |                |        |        |        |        |
|                                            | A              | 1- 55% | 2- 45% | 1- 56% | 2- 42% |
|                                            | C              | 1- 56% | 2- 44% | 1- 60% | 2- 40% |

[a] In the event of several couples of NTOs, only those whose contribution to the wave function is greater than 10% are taken into account and reported.

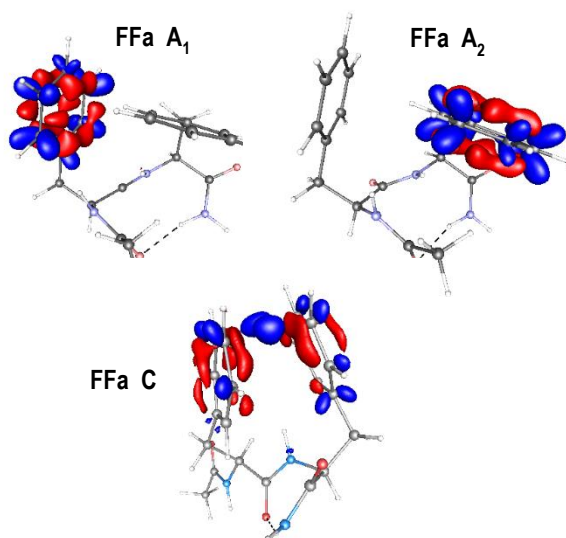

**Figure S9:** CC2/cc-pVDZ density difference contours ( $\pm 0.0019$  au) between each of the two  $\pi\pi^*$  excited states (A<sub>1</sub> and A<sub>2</sub>) and the ground state, in FFa A (top panel) and between excited and ground states in FFa C.<sup>3</sup> A density increase (decrease) is indicated in blue (red).

**S10: Amide A region frequencies of both the ground ( $S_0$ ) and  $\pi\pi^*$  excited ( $S_1$ ) states of the GFa A, B', FFa A<sub>1</sub>,A<sub>2</sub>,C and QFa A,C conformers.**

**Table S10a:** CC2/cc-pVDZ *amide A* region frequencies ( $\text{cm}^{-1}$ ) of both the ground ( $S_0$ ) and  $\pi\pi^*$  excited ( $S_1$ ) states of the GFa A, B' conformers,<sup>3</sup> together with the IR available experimental ones ( $\text{cm}^{-1}$ ).

| Conformer/State   |       | NH <sub>Gly</sub> | NH <sub>Phe</sub> | NH <sub>2 sym.</sub> | NH <sub>2 anti.</sub> |
|-------------------|-------|-------------------|-------------------|----------------------|-----------------------|
| GFa A             | $S_1$ | 3635              | 3434              | 3475                 | 3675                  |
|                   | $S_0$ | 3642              | 3452              | 3480                 | 3675                  |
| GFa B'            | $S_1$ | 3626              | 3582              | 3530                 | 3694                  |
|                   | $S_0$ | 3626              | 3603              | 3529                 | 3695                  |
| <b>Experiment</b> |       |                   |                   |                      |                       |
| GFa A             | $S_1$ | 3492              | 3302              | 3358                 | 3510                  |
|                   | $S_0$ | 3494              | 3320              | 3355                 | 3519                  |
| GFa B'            | $S_1$ | 3494              | 3423              | 3387                 | 3519                  |
|                   | $S_0$ | 3493              | 3441              | 3385                 | 3518                  |

**Table S10b:**  $\omega$ B97XD/cc-pVDZ *amide A* region frequencies ( $\text{cm}^{-1}$ ) of both the ground ( $S_0$ ) and  $\pi\pi^*$  excited ( $S_1$ ) states of the GFa A, B' conformers.

| Conformer/State |       | NH <sub>Gly</sub> | NH <sub>Phe</sub> | NH <sub>2 sym.</sub> | NH <sub>2 anti.</sub> |
|-----------------|-------|-------------------|-------------------|----------------------|-----------------------|
| GFa A           | $S_1$ | 3673              | 3494*             | 3515*                | 3713                  |
|                 | $S_0$ | 3675              | 3504*             | 3512*                | 3712                  |
| GFa B'          | $S_1$ | 3672              | 3641              | 3547                 | 3718                  |
|                 | $S_0$ | 3673              | 3645              | 3546                 | 3717                  |

\*Coupled modes. The size of the symbol indicate the strength of the coupling

**Table S10c:** CC2/cc-pVDZ *amide A* region frequencies (cm<sup>-1</sup>) of both the ground (S<sub>0</sub>) and  $\pi\pi^*$  excited (S<sub>1</sub>) states of the FFa A<sub>1</sub>, A<sub>2</sub>, C conformers,<sup>3</sup> together with the IR available experimental ones (cm<sup>-1</sup>).

| Conformer/State    |                | NH <sub>Phe1</sub> | NH <sub>Phe2</sub> | NH <sub>2 sym.</sub> | NH <sub>2 anti.</sub> |
|--------------------|----------------|--------------------|--------------------|----------------------|-----------------------|
| FFa A <sub>1</sub> | S <sub>1</sub> | 3540               | 3587               | 3545                 | 3711                  |
| FFa A <sub>2</sub> | S <sub>1</sub> | 3576               | 3562               | 3547                 | 3713                  |
| FFa A              | S <sub>0</sub> | 3581               | 3596               | 3549                 | 3714                  |
| FFa C              | S <sub>1</sub> | 3595               | 3467               | 3458                 | 3681                  |
|                    | S <sub>0</sub> | 3607               | 3541               | 3488                 | 3692                  |
| <b>Experiment</b>  |                |                    |                    |                      |                       |
| FFa A <sub>1</sub> | S <sub>1</sub> | 3414               | 3438               | 3390                 | 3524                  |
| FFa A <sub>2</sub> | S <sub>1</sub> | 3446               | 3414               | 3390                 | 3524                  |
| FFa A              | S <sub>0</sub> | 3447               | 3438               | 3391                 | 3524                  |
| FFa C              | S <sub>0</sub> | 3445               | 3418               | 3382                 | 3518                  |

**Table S10d:**  $\omega$ B97XD/cc-pVDZ *amide A* region frequencies (cm<sup>-1</sup>) of both the ground (S<sub>0</sub>) and  $\pi\pi^*$  excited (S<sub>1</sub>) states of the FFa A<sub>1</sub>, A<sub>2</sub>, C conformers.

| Conformer/State    |                | NH <sub>Phe1</sub> | NH <sub>Phe2</sub> | NH <sub>2 sym.</sub> | NH <sub>2 anti.</sub> |
|--------------------|----------------|--------------------|--------------------|----------------------|-----------------------|
| FFa A <sub>1</sub> | S <sub>1</sub> | 3595               | 3650               | 3568                 | 3729                  |
| FFa A <sub>2</sub> | S <sub>1</sub> | 3629*              | 3636*              | 3568                 | 3729                  |
| FFa A              | S <sub>0</sub> | 3635               | 3657               | 3565                 | 3729                  |
| FFa C              | S <sub>1</sub> | 3633               | 3538*              | 3510*                | 3715                  |
|                    | S <sub>0</sub> | 3642               | 3598               | 3531                 | 3722                  |

\*Coupled modes. The size of the symbol indicate the strength of the coupling

**Table S10e:** CC2/cc-pVDZ *amide A* region frequencies (cm<sup>-1</sup>) of both the ground (S<sub>0</sub>) and  $\pi\pi^*$  excited (S<sub>1</sub>) states of the three QFa A, C conformers,<sup>3</sup> together with the available IR experimental ones (cm<sup>-1</sup>).

| Conformer/State   |                | NH <sub>Gln</sub> | NH <sub>Phe</sub> | NH <sub>2</sub><br>sym./C-term | NH <sub>2</sub><br>anti./C-term | NH <sub>2</sub><br>sym./Chain | NH <sub>2</sub><br>anti./Chain |
|-------------------|----------------|-------------------|-------------------|--------------------------------|---------------------------------|-------------------------------|--------------------------------|
| QFa A             | S <sub>1</sub> | 3397              | 3570              | 3529                           | 3705                            | 3601                          | 3759                           |
|                   | S <sub>0</sub> | 3399              | 3582              | 3521                           | 3700                            | 3603                          | 3761                           |
| QFa C             | S <sub>1</sub> | 3441              | 3560              | 3517                           | 3699                            | 3588                          | 3740                           |
|                   | S <sub>0</sub> | 3450              | 3576              | 3519                           | 3699                            | 3587                          | 3739                           |
| <b>Experiment</b> |                |                   |                   |                                |                                 |                               |                                |
| QFa A             | S <sub>0</sub> | 3285              | 3409              | 3365                           | 3519                            | 3442                          | 3562                           |
| QFa C             | S <sub>0</sub> | 3336              | 3440              | 3367                           | 3514                            | 3426                          | 3557                           |

**Table S10f:**  $\omega$ B97XD/cc-pVDZ *amide A* region frequencies (cm<sup>-1</sup>) of both the ground (S<sub>0</sub>) and  $\pi\pi^*$  excited (S<sub>1</sub>) states of the three QFa A, C conformers.

| Conformer/State |                | NH <sub>Gln</sub> | NH <sub>Phe</sub> | NH <sub>2</sub><br>sym./C-term | NH <sub>2</sub><br>anti./C-term | NH <sub>2</sub><br>sym./Chain | NH <sub>2</sub><br>anti./Chain |
|-----------------|----------------|-------------------|-------------------|--------------------------------|---------------------------------|-------------------------------|--------------------------------|
| QFa A           | S <sub>1</sub> | 3468              | 3622              | 3535                           | 3718                            | 3622                          | 3769                           |
|                 | S <sub>0</sub> | 3474              | 3644              | 3537                           | 3718                            | 3626                          | 3769                           |
| QFa C           | S <sub>1</sub> | 3487              | 3610              | 3533                           | 3715                            | 3620                          | 3767                           |
|                 | S <sub>0</sub> | 3496              | 3642              | 3535                           | 3715                            | 3618                          | 3764                           |

**S11:** Experimental vs  $\omega$ B97XD/cc-pVDZ calculated harmonic *amide A* region frequencies of both the  $S_0$  and  $S_1$  states of the series of capped peptides and the corresponding mode-dependent linear ( $v_{\text{exp.}} = av_{\text{theo.}} + b$ ) scaling functions.

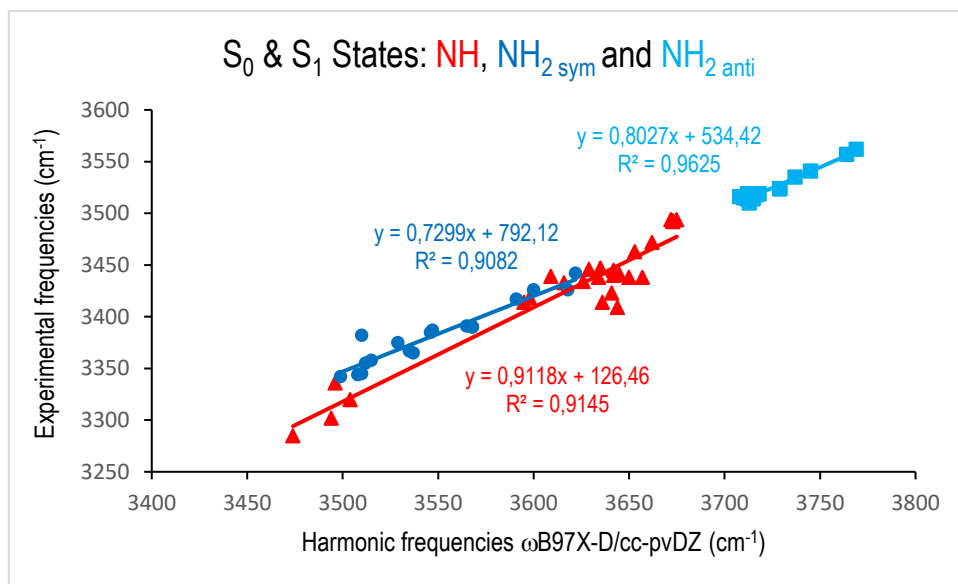

**Figure S11:** Experimental vs CC2/cc-pVDZ calculated harmonic *amide A* region frequencies of the  $S_0$  and  $S_1$  states of the series of capped peptides and the corresponding mode-dependent linear ( $v_{\text{exp.}} = av_{\text{theo.}} + b$ ) scaling functions.

**S12: Timing of TDDFT and CC2 calculations**

The timing have been determined on a dual-processor Intel Skylake 8168 fine node with 24 cores per processor for the geometry optimization (~ 25 cycles) and for the TD-DFT( $\omega$ B97X-D) frequencies calculation. The system chosen is the GFa A conformer that contains 36 atoms and 140 electrons and the basis set used is the cc-pVDZ basis set. With the CC2 method, the frequencies calculation is numerical and 216 energy and gradient calculations have been performed on 5 dual-processor Intel Skylake 8168 fine node, each calculation using 8 cores.

**Table S12:** Timing of the geometry optimization and frequencies calculation of GFa A ( $S_1$ ) with the TD-DFT and the CC2 methods.

| Timing (minutes)            | TD-DFT<br>( $\omega$ B97X-D) | CC2 |
|-----------------------------|------------------------------|-----|
| $E_{\text{optimized}}(S_1)$ | 92                           | 273 |
| Frequencies( $S_1$ )        | 12                           | 480 |

## References:

1. Chin, W.; Mons, M.; Dognon, J. P.; Piuze, F.; Tardivel, B.; Dimicoli, I. Competition between local conformational preferences and secondary structures in gas-phase model tripeptides as revealed by laser spectroscopy and theoretical chemistry. *Physical Chemistry Chemical Physics* **2004**, 6 (10), 2700-2709.
2. unpublished material for review only.
3. CC2 results are from M.-S. Dupuy, E. Gloaguen, B. Tardivel, M. Mons, V. Brenner, *J. Chem. Theory Comput.* **2020**, 16, 601-611.
